# Supplementary material for: Phosphonates containing 8-hydroxyquinoline moiety and their metal complexes: structures, fluorescent and magnetic properties
Source: Royal Society of Chemistry journal article supplement (doi:10.1039/c3dt51108a), 2013-01-01
Supplement: c3dt51108a.pdf [file c3dt51108a.pdf]

## Electronic Supporting Information

**Table S1** Selected bond angles (°) for **1**·HCl·H<sub>2</sub>O

|          |            |           |            |
|----------|------------|-----------|------------|
| O1-P1-O2 | 111.33(12) | O1-P1-C10 | 109.80(13) |
| O1-P1-O3 | 114.70(12) | O2-P1-C10 | 108.24(12) |
| O2-P1-O3 | 104.72(11) | O3-P1-C10 | 107.74(12) |

**Table S2** Selected bond angles (°) for **1**·H<sub>2</sub>O

|          |            |           |            |
|----------|------------|-----------|------------|
| O1-P1-O2 | 114.35(18) | O1-P1-C10 | 108.56(17) |
| O1-P1-O3 | 109.88(16) | O2-P1-C10 | 109.62(18) |
| O2-P1-O3 | 109.32(16) | O3-P1-C10 | 104.67(17) |

**Table S3** Selected bond angles (°) for **2**

|             |            |             |            |
|-------------|------------|-------------|------------|
| N1-Zn1-O4   | 76.23(14)  | O1W-Zn1-O2A | 92.30(14)  |
| N1-Zn1-O1W  | 93.58(15)  | O1B-Zn1-O2A | 118.19(13) |
| O4-Zn1-O1W  | 169.81(13) | C1-N1-Zn1   | 124.1(3)   |
| N1-Zn1-O1B  | 129.50(14) | C8-O4-Zn1   | 112.5(3)   |
| N1-Zn1-O2A  | 111.08(14) | C9-N1-Zn1   | 115.6(3)   |
| O4-Zn1-O1B  | 91.85(13)  | P1-O1-Zn1B  | 128.8(2)   |
| O4-Zn1-O2A  | 91.29(13)  | P1-O2-Zn1C  | 130.64(18) |
| O1W-Zn1-O1B | 94.84(14)  |             |            |

Symmetry codes: A :  $x, -y + 1/2, z + 1/2$ ; B:  $-x + 1, -y, -z + 1$ ; C:  $x, -y + 1/2, z - 1/2$ .

**Table S4** Selected bond angles (°) for **3**

|             |            |             |            |
|-------------|------------|-------------|------------|
| O1A-Cu1-O2B | 93.75(10)  | N1-Cu1-O4   | 75.51(10)  |
| O1A-Cu1-O5C | 86.35(10)  | P1-O1-Cu1D  | 137.69(15) |
| O2B-Cu1-O5C | 176.75(10) | P1-O2-Cu1B  | 133.43(15) |
| O1A-Cu1-N1  | 169.70(11) | C8-O4-Cu1   | 109.09(18) |
| O2B-Cu1-N1  | 93.92(10)  | C11-O4-Cu1  | 118.83(18) |
| O5C-Cu1-N1  | 86.38(10)  | C12-O5-Cu1E | 106.4(2)   |
| O1A-Cu1-O4  | 97.38(9)   | C1-N1-Cu1   | 121.9(2)   |
| O2B-Cu1-O4  | 91.84(9)   | C9-N1-Cu1   | 117.9(2)   |
| O5C-Cu1-O4  | 91.36(9)   |             |            |

Symmetry codes: A:  $x - 1, y, z$ ; B,  $-x, -y + 1, -z + 1$ ; C,  $x, -y + 1/2, z + 1/2$ ; D,  $x + 1, y, z$ ; E,  $x, -y + 1/2, z - 1/2$ .

**Table S5** Selected bond angles ( $^{\circ}$ ) for **4**

|             |            |            |           |
|-------------|------------|------------|-----------|
| O2A-Fe1-O1B | 99.39(15)  | N1-Fe1-O4  | 71.98(12) |
| O2A-Fe1-O1B | 99.39(15)  | N1-Fe1-O4  | 71.98(12) |
| O2A-Fe1-O5  | 102.44(15) | P1-O1-Fe1B | 151.0(2)  |
| O1B-Fe1-O5  | 106.71(16) | P1-O2-Fe1C | 138.3(2)  |
| O2A-Fe1-N1  | 112.58(13) | C8-O4-Fe1  | 119.1(3)  |
| O1B-Fe1-N1  | 90.39(15)  | C11-O4-Fe1 | 118.3(2)  |
| O5-Fe1-N1   | 137.85(14) | C12-O5-Fe1 | 122.8(3)  |
| O2A-Fe1-O4  | 114.59(14) | C1-N1-Fe1  | 122.7(3)  |
| O1B-Fe1-O4  | 145.54(14) | C9-N1-Fe1  | 118.6(3)  |

Symmetry codes: A :  $-x + 2, y + 1/2, -z + 3/2$  ; B:  $-x + 2, -y + 1, -z + 1$ ; C:  $-x + 2, y - 1/2, -z + 3/2$

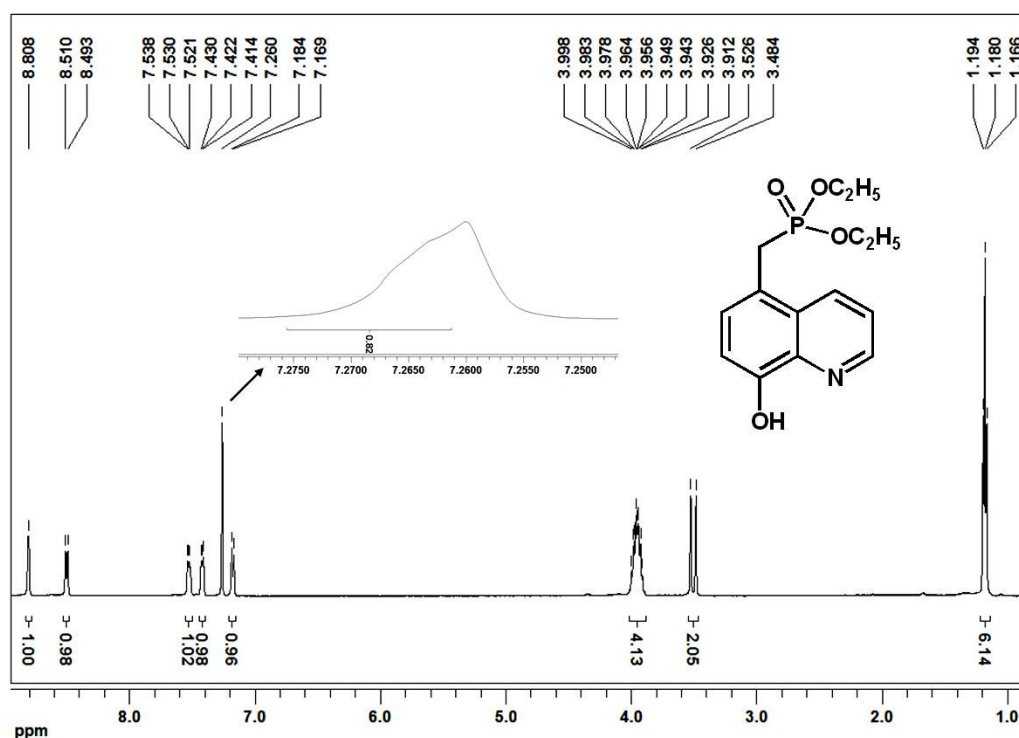

**Fig. S1**  $^1\text{H}$  NMR spectrum of 5dpm8hqH (500 MHz,  $\text{CDCl}_3$ ).

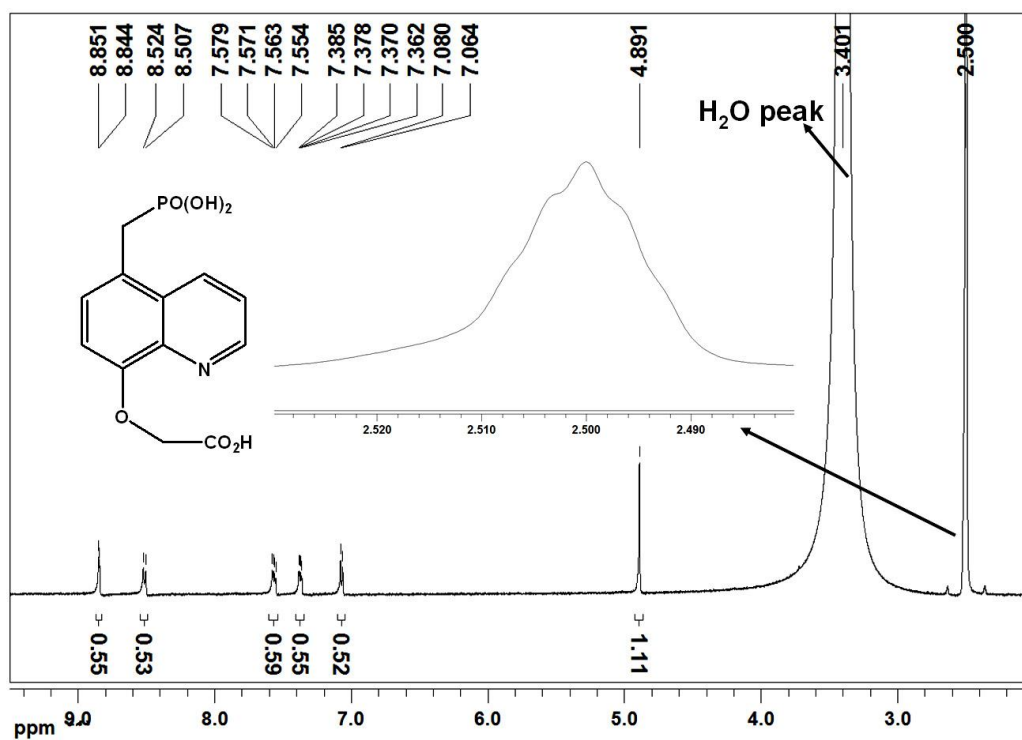

Fig. S2 <sup>1</sup>H NMR spectrum of 5pm8cmoqH<sub>3</sub> (500 MHz, DMSO-*d*<sub>6</sub>).

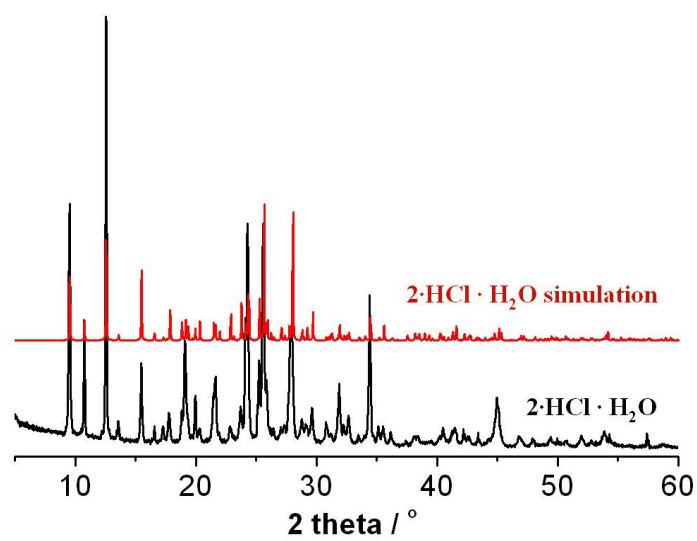

Fig. S3 Experimental and simulated XRD patterns of 1·HCl·H<sub>2</sub>O.

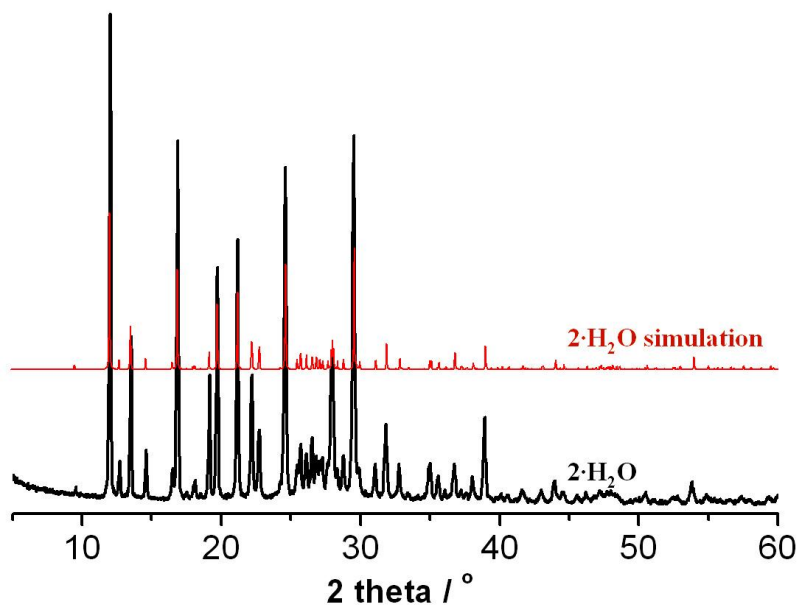

**Fig. S4** Experimental and simulated XRD patterns of 1·H<sub>2</sub>O.

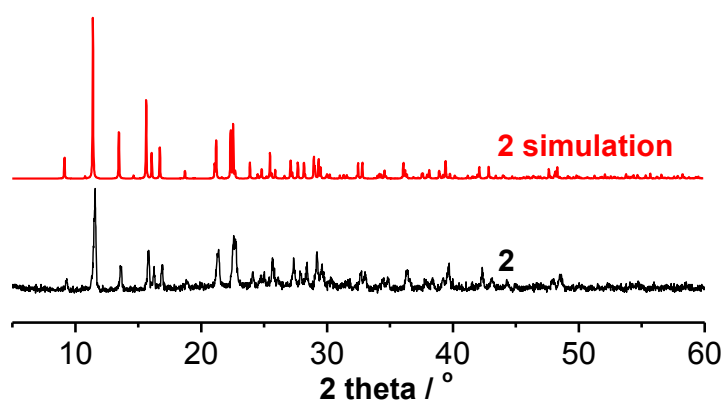

**Fig. S5** Experimental and simulated XRD patterns of 2.

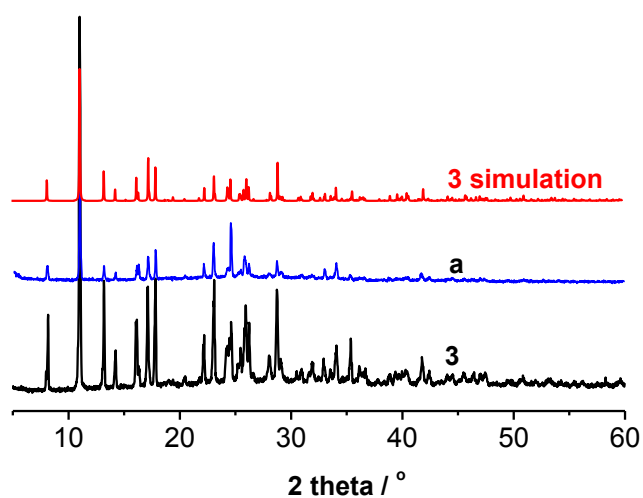

**Fig. S6** Experimental and simulated XRD patterns of 3, and pattern for the rehydration sample of 3-de (curve a).

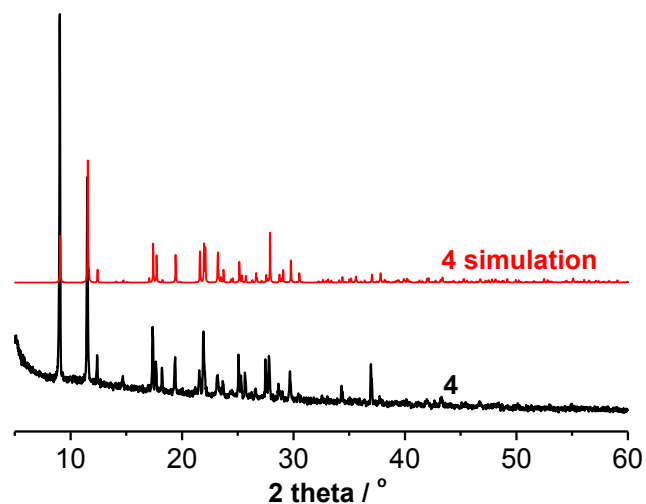

**Fig. S7** Experimental and simulated XRD patterns of 4.

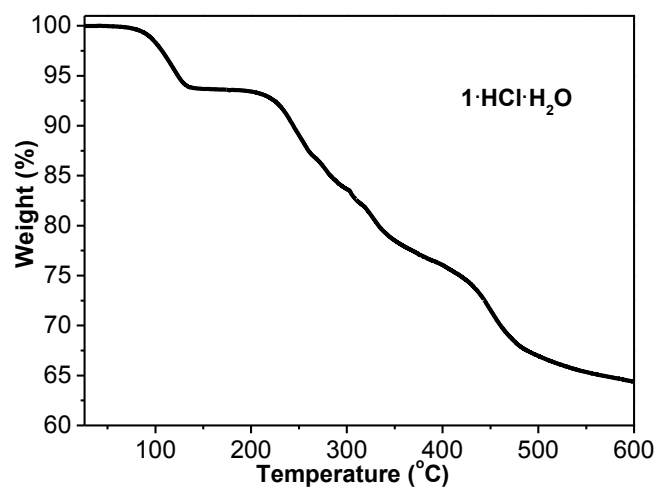

**Fig. S8** TG curve of compound 1·HCl·H<sub>2</sub>O.

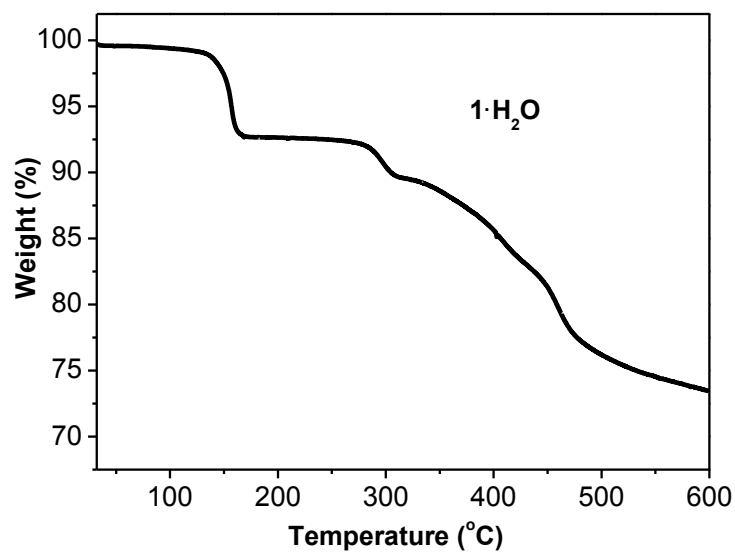

**Fig. S9** TG curve of compound 1·H<sub>2</sub>O.

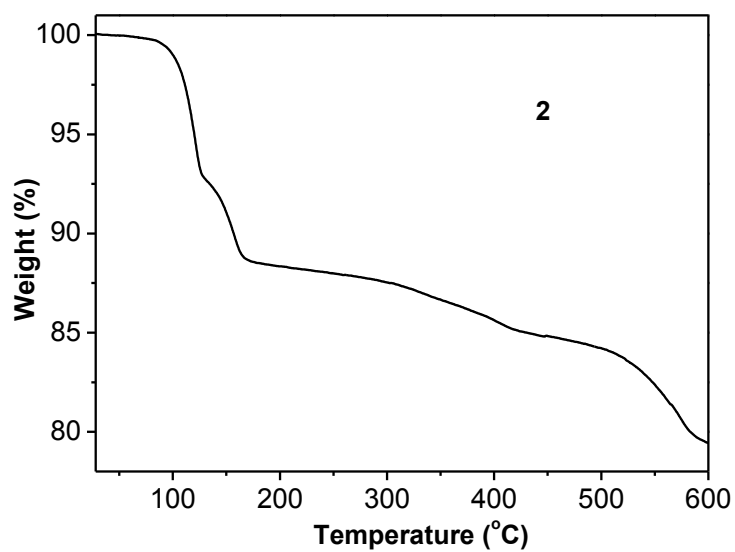

**Fig. S10** TG curve of compound **2**.

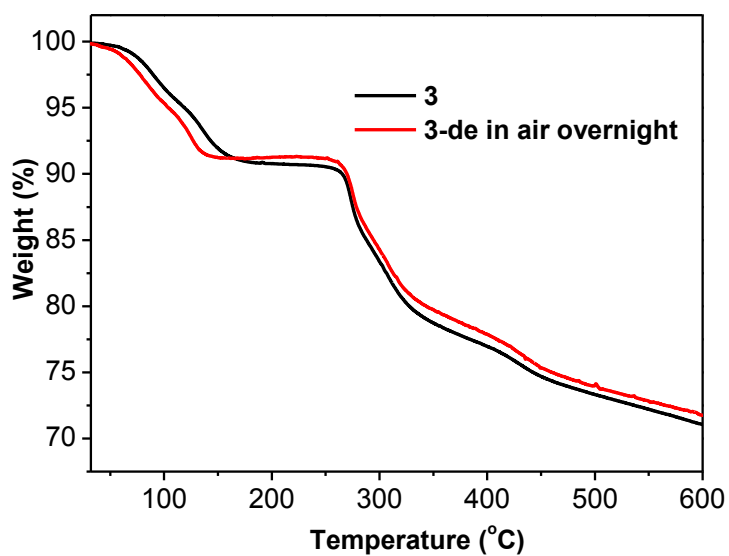

**Fig. S11** TG curve of compound **3** and **3-de** in air overnight.

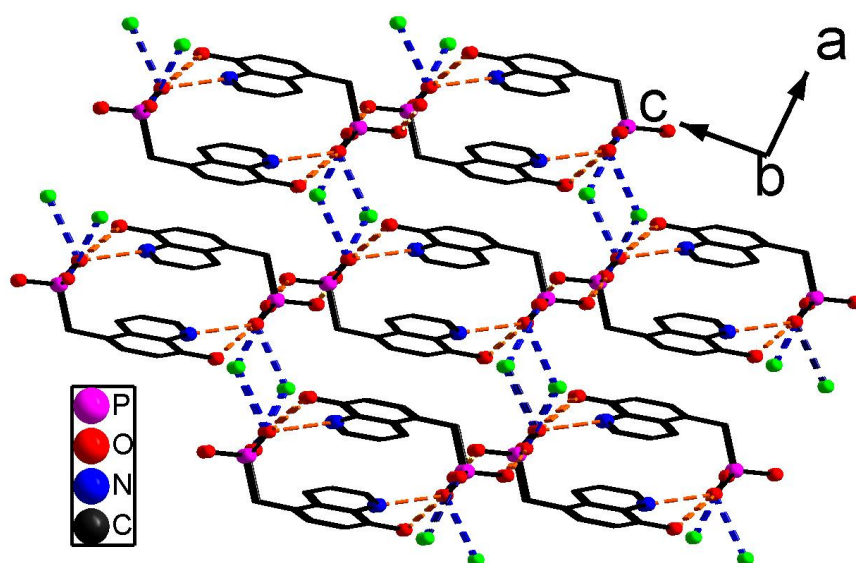

**Fig. S12** The supramolecular three-dimensional structure of 1·H<sub>2</sub>O.

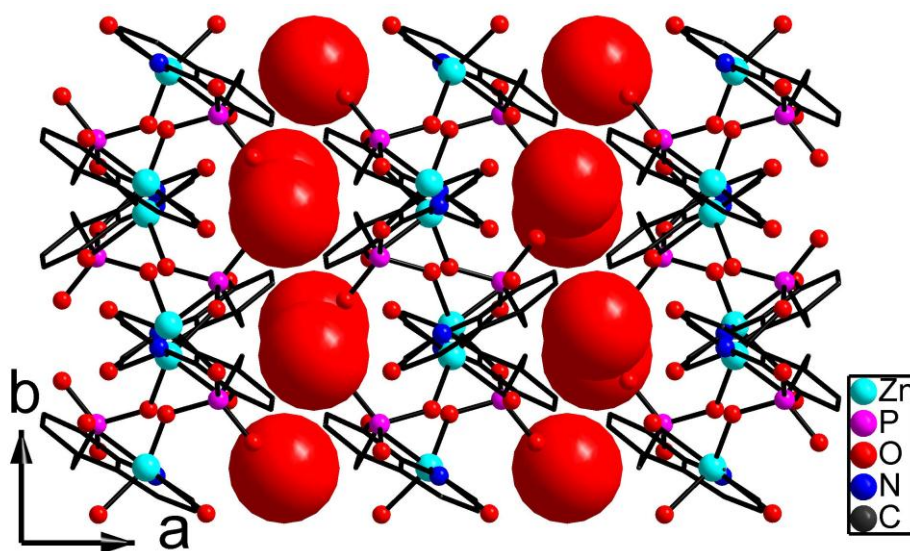

**Fig. S13** The supramolecular three-dimensional structure of 2.

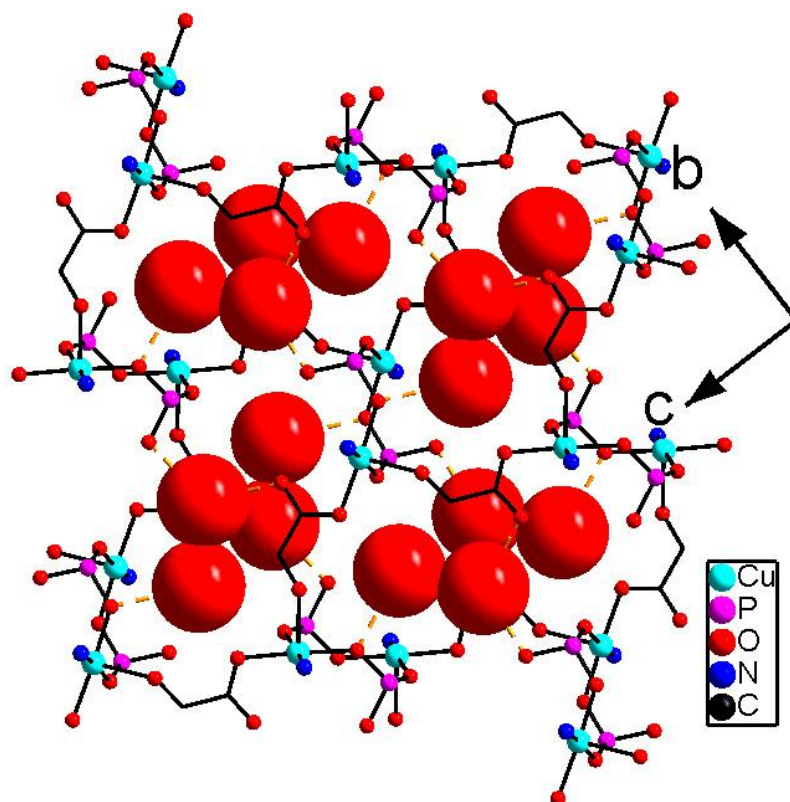

**Fig. S14** The hybrid layer containing lattice water molecules in **3**.

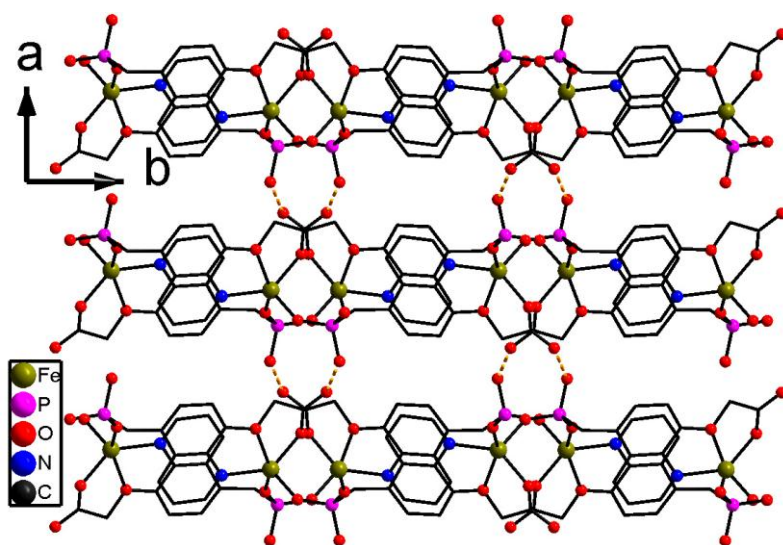

**Fig. S15** The supramolecular three dimensional structure of **4**.



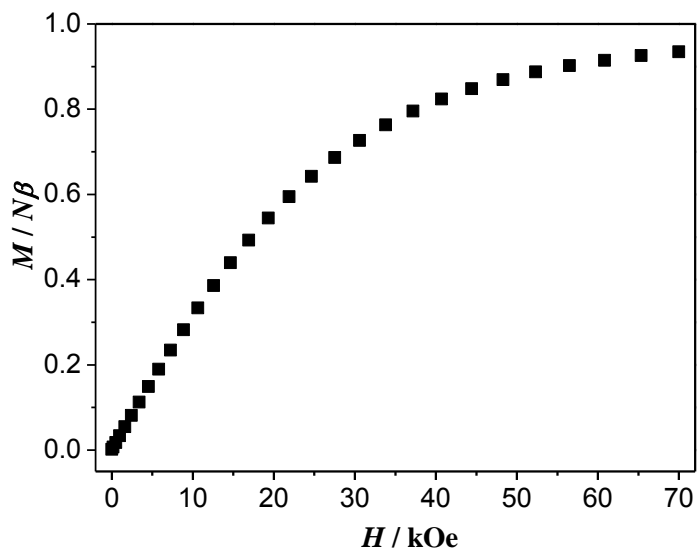

**Fig. S16** Field-dependent magnetization for **3** at 1.8 K.

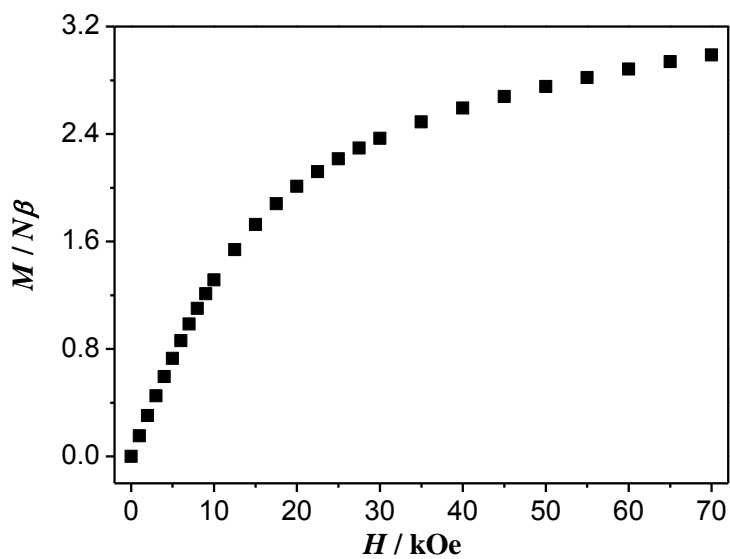

**Fig. S17** Field-dependent magnetization for **4** at 1.8 K.
